# Supplementary material for: Seeking certainty about Intolerance of Uncertainty: Addressing old and new issues through the Intolerance of Uncertainty Scale-Revised
Source: PubMed Central journal article supplement (PMC6370219; doi:10.1371/journal.pone.0211929), 2019-02-11
Supplement: pone.0211929.s001.pdf [file pone.0211929.s001.pdf]

## IUS-R

ISTRUZIONI: Di seguito troverà una serie di affermazioni. La preghiamo di leggere attentamente ciascuna affermazione e di cerchiare quella che meglio la descrive.

|    |                                                                                                            |                      |                  |                         |                 |                         |
|----|------------------------------------------------------------------------------------------------------------|----------------------|------------------|-------------------------|-----------------|-------------------------|
| 1  | Quando le cose accadono improvvisamente mi agito molto                                                     | Per niente d'accordo | Un po' d'accordo | Moderatamente d'accordo | Molto d'accordo | Completamente d'accordo |
| 2  | Le cose che non conosco mi infastidiscono                                                                  | Per niente d'accordo | Un po' d'accordo | Moderatamente d'accordo | Molto d'accordo | Completamente d'accordo |
| 3  | Le persone dovrebbero sempre pensare a cosa potrebbe accadere. Questo farà sì che non accadano cose brutte | Per niente d'accordo | Un po' d'accordo | Moderatamente d'accordo | Molto d'accordo | Completamente d'accordo |
| 4  | Anche quando pianifichi molto bene le cose, un piccolo dettaglio può rovinare tutto                        | Per niente d'accordo | Un po' d'accordo | Moderatamente d'accordo | Molto d'accordo | Completamente d'accordo |
| 5  | Voglio sempre sapere cosa mi accadrà in futuro                                                             | Per niente d'accordo | Un po' d'accordo | Moderatamente d'accordo | Molto d'accordo | Completamente d'accordo |
| 6  | Non sopporto quando le cose accadono improvvisamente                                                       | Per niente d'accordo | Un po' d'accordo | Moderatamente d'accordo | Molto d'accordo | Completamente d'accordo |
| 7  | Dovrei essere sempre preparato prima che accada qualcosa                                                   | Per niente d'accordo | Un po' d'accordo | Moderatamente d'accordo | Molto d'accordo | Completamente d'accordo |
| 8  | Sentirmi incerto mi blocca nel fare la maggior parte delle cose                                            | Per niente d'accordo | Un po' d'accordo | Moderatamente d'accordo | Molto d'accordo | Completamente d'accordo |
| 9  | Quando non sono certo su cosa fare rimango paralizzato                                                     | Per niente d'accordo | Un po' d'accordo | Moderatamente d'accordo | Molto d'accordo | Completamente d'accordo |
| 10 | Quando non so cosa accadrà, non riesco a fare le cose molto bene                                           | Per niente d'accordo | Un po' d'accordo | Moderatamente d'accordo | Molto d'accordo | Completamente d'accordo |
| 11 | Anche la più piccola preoccupazione può bloccarmi nel fare le cose                                         | Per niente d'accordo | Un po' d'accordo | Moderatamente d'accordo | Molto d'accordo | Completamente d'accordo |
| 12 | Devo stare lontano da tutte le cose di cui non sono certo                                                  | Per niente d'accordo | Un po' d'accordo | Moderatamente d'accordo | Molto d'accordo | Completamente d'accordo |
